# Supplementary material for: Clinical Validation of a Plasma Donor-derived Cell-free DNA Assay to Detect Allograft Rejection and Injury in Lung Transplant
Source: PubMed Central journal article supplement — Transplant Direct. 2022 Mar 25;8(4):e1317. doi: 10.1097/TXD.0000000000001317 (PMC8963832; doi:10.1097/txd.0000000000001317), 2022-03-25
Supplement: txd-8-e1317-s001.pdf [file txd-8-e1317-s001.pdf]

### Supplemental Digital Content

**Table S1.** Bootstrapped AUROC and diagnostic accuracy measures for acute rejection (AR, acute cellular rejection (ACR) + antibody-mediated rejection (AMR)) vs stable and combined (AR + chronic lung allograft dysfunction/neutrophilic-responsive allograft dysfunction (CLAD/NRAD) + allograft infection (INFXN)) vs the stable cohort (dd-cfDNA fraction thresholds of 0.50%-1.25%).

a) AR vs stable (AUROC: 0.91 (95% CI:0.83, 0.98))

|                    | <b>0.50%</b>           | <b>0.75%</b>           | <b>1.00%</b>           | <b>1.25%</b>           |
|--------------------|------------------------|------------------------|------------------------|------------------------|
| <b>Sensitivity</b> | 94.73% (86.35-100.00%) | 90.63% (78.70-100.00%) | 89.06% (76.17-100.00%) | 85.13% (70.24-100.00%) |
| <b>Specificity</b> | 52.67% (39.98-65.36%)  | 75.85% (64.98-86.72%)  | 82.86% (73.29-92.44%)  | 88.76% (80.73-96.78%)  |
| <b>PPV</b>         | 29.38% (23.52-35.24%)  | 43.83% (32.28-55.37%)  | 51.93% (37.52-66.34%)  | 61.15% (43.69-78.61%)  |
| <b>NPV</b>         | 97.96% (94.75-100.00%) | 97.50% (94.37-100.00%) | 97.33% (94.25-100.00%) | 96.63% (93.36-99.90%)  |

b) Combined vs stable. (AUROC 0.76 (95% CI: 0.66-0.85))

|                    | <b>0.50%</b>          | <b>0.75%</b>          | <b>1.00%</b>          | <b>1.25%</b>          |
|--------------------|-----------------------|-----------------------|-----------------------|-----------------------|
| <b>Sensitivity</b> | 77.39% (65.49-89.30%) | 65.52% (51.99-79.05%) | 59.92% (45.96-73.87%) | 53.22% (39.01-67.43%) |
| <b>Specificity</b> | 54.44% (41.15-67.74%) | 76.43% (65.12-87.75%) | 83.87% (74.06-93.68%) | 89.78% (81.71-97.84%) |
| <b>PPV</b>         | 26.10% (19.74-32.46%) | 36.63% (24.49-48.76%) | 43.57% (27.56-59.58%) | 51.97% (31.18-72.76%) |
| <b>NPV</b>         | 92.05% (87.81-96.30%) | 91.43% (88.14-94.71%) | 90.96% (87.94-93.98%) | 90.23% (87.43-93.02%) |

**Table S2.** Bootstrapped diagnostic accuracy measures for ACR vs the stable cohort, AMR vs the stable cohort and combined rejection (AR+ chronic lung allograft dysfunction/neutrophilic-responsive allograft dysfunction (CLAD/NRAD)) vs the stable cohort (dd-cfDNA fraction threshold  $\geq 1.0\%$ ).

|                    | <b>ACR vs Stable</b>      | <b>AMR vs Stable</b>      | <b>Combined Rejection vs Stable</b> |
|--------------------|---------------------------|---------------------------|-------------------------------------|
| <b>AUROC</b>       | 0.87 (0.76-0.98)          | 0.96 (0.92-1.00)          | 0.79 (95% CI:0.69-0.89)             |
| <b>Sensitivity</b> | 82.9% (95% CI:63.5-100%)  | 100% (95% CI:80.55-100%)  | 67.7% (95% CI:52.4-83.0)            |
| <b>Specificity</b> | 82.2% (95% CI:72.5-91.9%) | 82.5% (95% CI:73.3-91.7%) | 84.1% (95%CI: 74.8-93.5)            |
| <b>PPV</b>         | 49.2% (95% CI:34.4-64.0%) | 54.3% (95%CI: 41.2-67.3%) | 47.0 (95% CI: 31.3-62.7)            |
| <b>NPV</b>         | 95.9% (95% CI:91.3-100%)  | 100% (96.7%-100%)         | 92.6 (95% CI: 89.3-96.0)            |

**Table S3.** Bootstrapped AUROC and diagnostic accuracy measures for acute rejection (AR, acute cellular rejection (ACR) + antibody-mediated rejection (AMR)) vs the stable cohort, and combined (AR+ chronic lung allograft dysfunction/neutrophilic-responsive allograft dysfunction (CLAD/NRAD) + allograft infection (INFXN)) vs the stable cohort with correction for single and double lung-transplant (dd-cfDNA fraction thresholds of 0.50%-1.25%).

a) AR vs stable (AUROC: 0.90 (95% CI:0.83-0.98))

|                    | <b>0.50%</b>          | <b>0.75%</b>          | <b>1.00%</b>          | <b>1.25%</b>          |
|--------------------|-----------------------|-----------------------|-----------------------|-----------------------|
| <b>Sensitivity</b> | 94.74% (86.36-100%)   | 90.67% (78.75-100%)   | 89.06% (76.18-100%)   | 85.13% (70.23-100%)   |
| <b>Specificity</b> | 48.31% (35.61-61.01%) | 71.20% (59.70-82.71%) | 79.07% (68.72-89.41%) | 87.91% (79.63-96.19%) |
| <b>PPV</b>         | 27.59% (22.37-32.81%) | 39.56% (29.51-49.61%) | 46.93% (34.11-59.75%) | 59.41% (42.37-76.45%) |
| <b>NPV</b>         | 97.79% (94.29-100%)   | 97.35% (94.02-100%)   | 97.20% (93.99-100%)   | 96.60% (93.30-99.90%) |

b) Combined vs stable. (AUROC 0.76 (95% CI: 0.67-0.86))

|                    | <b>0.50%</b>          | <b>0.75%</b>          | <b>1.00%</b>          | <b>1.25%</b>          |
|--------------------|-----------------------|-----------------------|-----------------------|-----------------------|
| <b>Sensitivity</b> | 80.56% (69.30-91.82%) | 68.36% (55.12-81.60%) | 64.84% (51.24-78.44%) | 59.23% (45.24-73.22%) |
| <b>Specificity</b> | 50.55% (37.21-63.89%) | 72.27% (60.33-84.21%) | 80.64% (70.10-91.18%) | 88.84% (80.46-97.22%) |
| <b>PPV</b>         | 25.30% (19.56-31.04%) | 33.88% (23.31-44.46%) | 41.04% (26.92-55.16%) | 52.46% (32.82-72.09%) |
| <b>NPV</b>         | 92.60% (88.23-96.96%) | 91.66% (88.22-95.10%) | 91.69% (88.58-94.80%) | 91.29% (88.46-94.12%) |

Figure S1

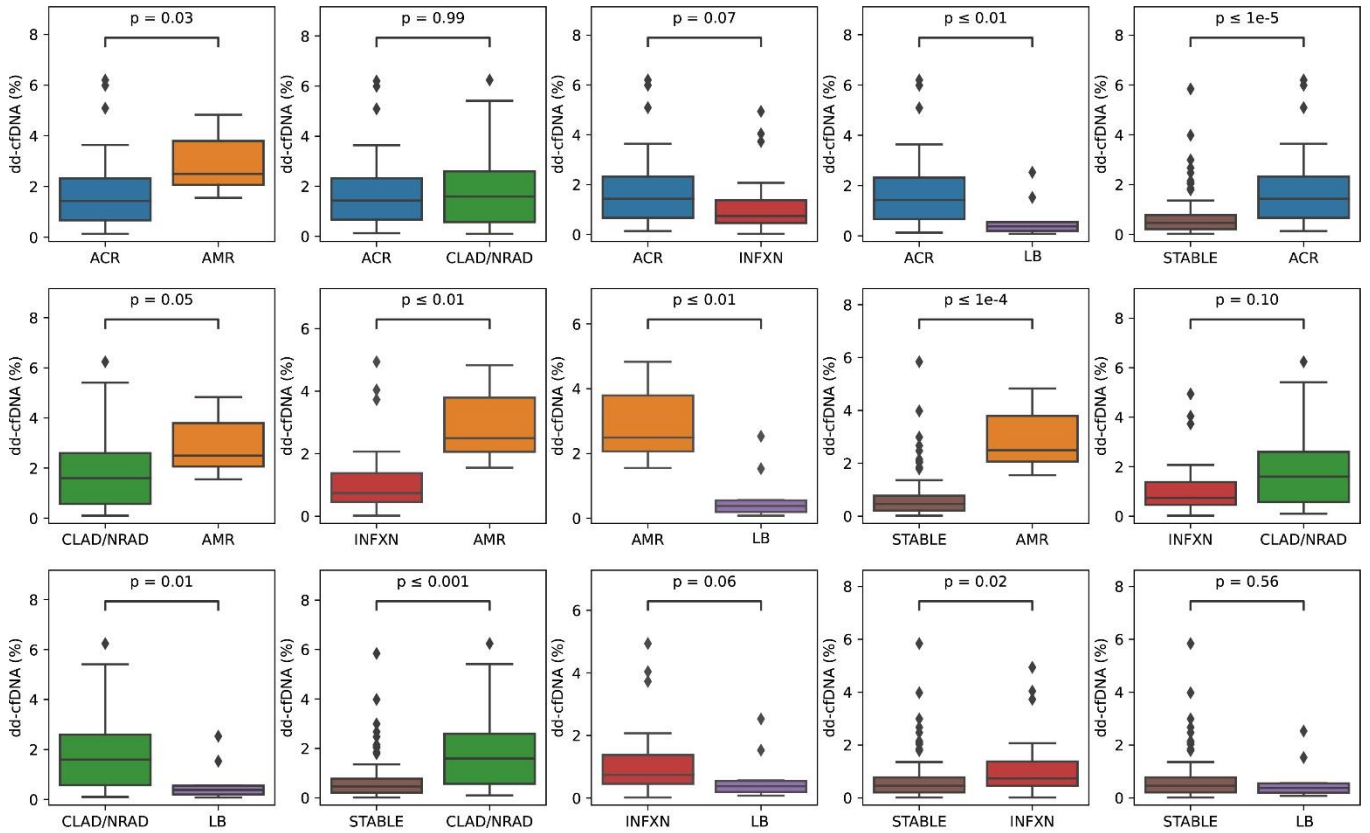

Figure S1: Mann-Whitney-Wilcoxon U test results for dd-cfDNA fraction (%) across clinical-pathologic diagnostic cohorts: acute cellular rejection (ACR), antibody-mediated rejection (AMR), chronic lung allograft dysfunction/neutrophilic-responsive allograft dysfunction (CLAD/NRAD), allograft infection (INFXN), lymphocytic bronchiolitis (LB), and the stable cohort.
